# Supplementary material for: Expression of Nitric Oxide-Transporting Aquaporin-1 Is Controlled by KLF2 and Marks Non-Activated Endothelium In Vivo
Source: PubMed Central journal article supplement (PMC4696733; doi:10.1371/journal.pone.0145777), 2015-12-30
Supplement: pone.0145777.s001.pdf [file pone.0145777.s001.pdf]

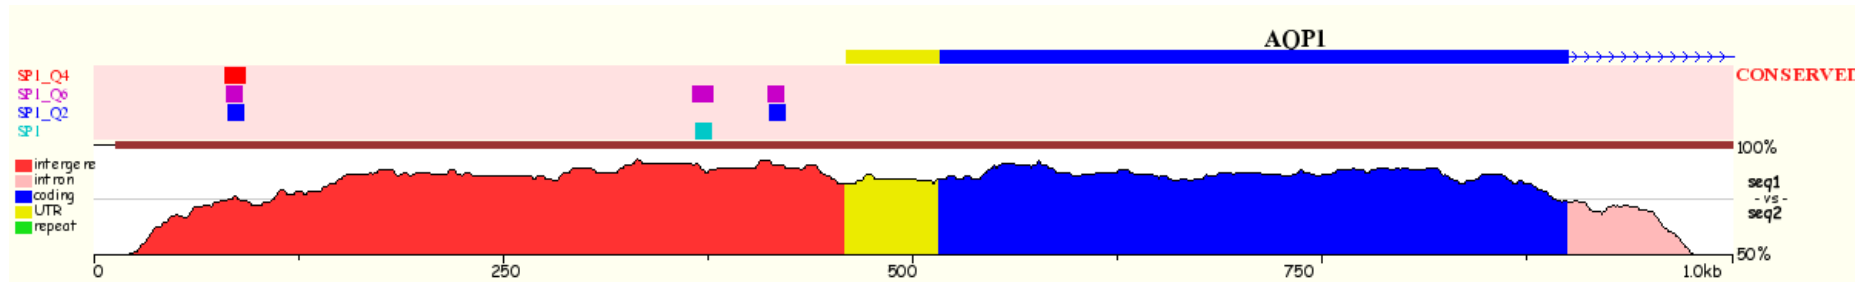

> hg18 chr7:30917535-30918538 1004bps GC:62.9%

GGGATGGGGATGTCAGGCCAGCAGGATCATGGTACCTGCCTCCAGGGAGGGCAACGTCCACCCACTGAGTCCAGCCCGCCCACCCACCCACTCCGGAGCACCTGGCTCTG  
 CCCTCAGGAACTCCCTGAGCTTTGCACACAGGGCCGAGACACCTGGATTTCTCTGGTTCCCTGAGTGGGGCCAGCTTGAAGAATTTCCCAAAGCCTATTAGAGCAACGGCT  
 GCCTCCTGCCTGCCTCCTTGGGCTGGGCAGGGCTGAGGGCGGAGGGAGAGAGAGAGAGAGGGAGGGGGAGAGGAGGAAGGAAAAAGTTGGCAGGCCGACAGCACAGC  
 CGTGTCTGCATCCATCCAGAGGAGGTCTGTGTGGTGTGGGGCGGGCCAGGAGCGAAGAGAGGCCTTCTCCCTTTGTGCTCCCCCGCCCCCCGGCCCTATAAATAGGCC  
 AGCCAGGCTGTGGCTCAGCTCTCAGAGGGAATTGAGCACCCGGCAGCGGTCTCAGGCCAAGCCCCCTGCCAGCATGGCCAGCGAGTTCAGAAGAAGCTCTTCTGGAGG  
 GCAGTGGTGGCCGAGTTCTGGCCACGACCTCTTTGTCTTCATCAGCATCGGTTCTGCCCTGGGCTTCAAATACCCGGTGGGGAACAACCAGACGGCGGTCCAGGACAAC  
 GTGAAGGTGTCGCTGGCCTTCGGGCTGAGCATCGCCACGCTGGCGCAGAGTGTGGGCCACATCAGCGGCGCCACCTCAACCCGGTGTCACTGGGGCTGCTGCTCAG  
 CTGCCAGATCAGCATCTCCGTGCCCTCATGTACATCATCGCCAGTGCCTGGGGCCATCGTCGCCACCGCCATCTCTCAGGCATCACCTCCTCCCTGACTGGGAACTCG  
 TTGGCCGAATGACGTGAGTGGGGTGTCCCTGGGCTTGGGGGGTTCTAGAATGATGCTGAAAGGCACTGGTTCCATCCTCTGCCATTGTGCAGATGGGGACACTGAGG  
 AACGGAGAG

S1 Fig.
