# Supplementary material for: Expression of Nitric Oxide-Transporting Aquaporin-1 Is Controlled by KLF2 and Marks Non-Activated Endothelium In Vivo
Source: PubMed Central journal article supplement (PMC4696733; doi:10.1371/journal.pone.0145777), 2015-12-30
Supplement: pone.0145777.s002.pdf [file pone.0145777.s002.pdf]

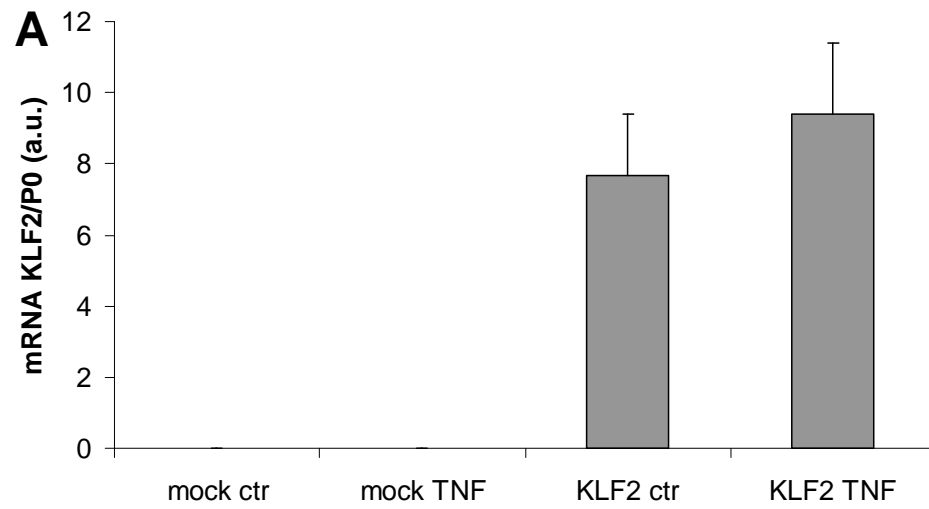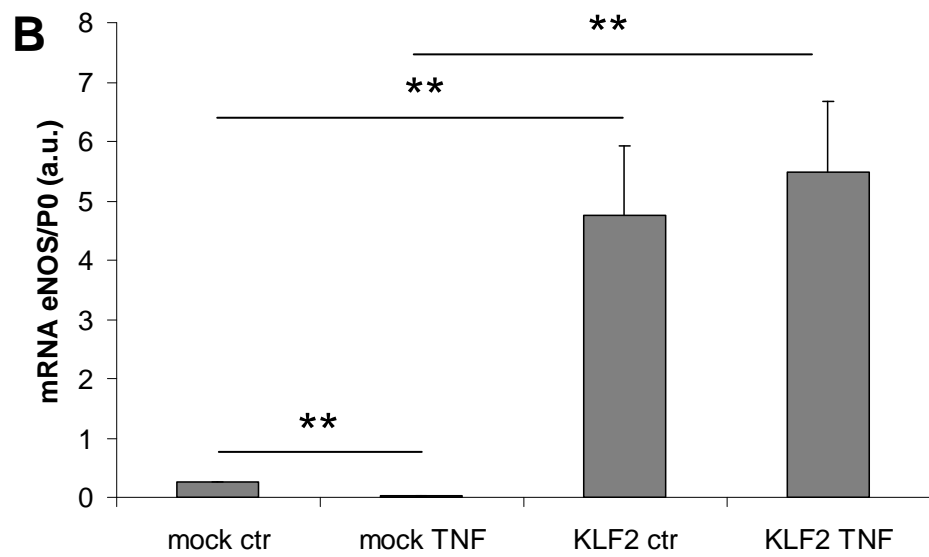

S2 Fig.
