# Supplementary figures and images for: Expression of Nitric Oxide-Transporting Aquaporin-1 Is Controlled by KLF2 and Marks Non-Activated Endothelium In Vivo
Source: PLOS journal article supplement (doi:10.1371/journal.pone.0145777), 2015-12-30

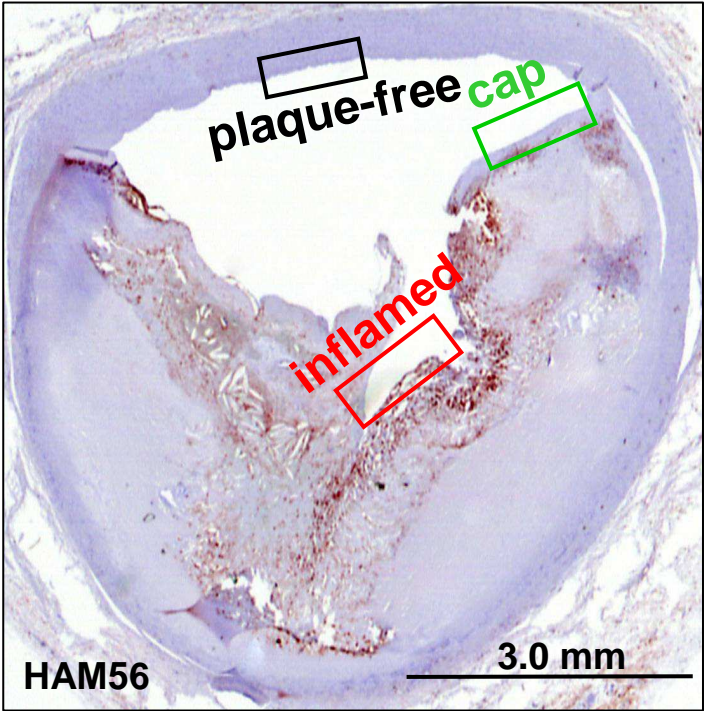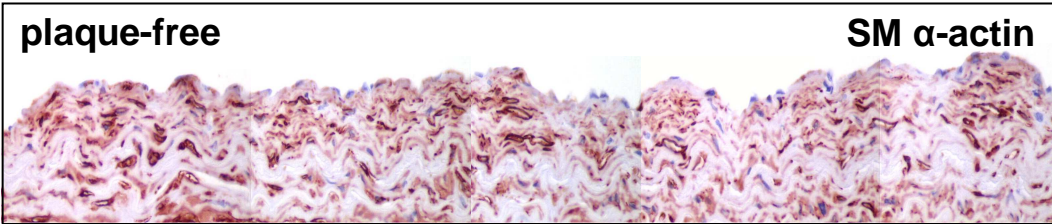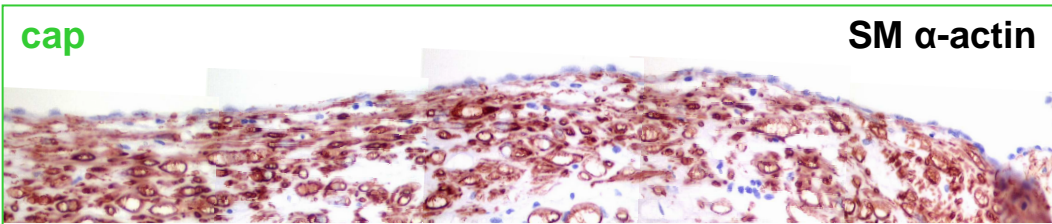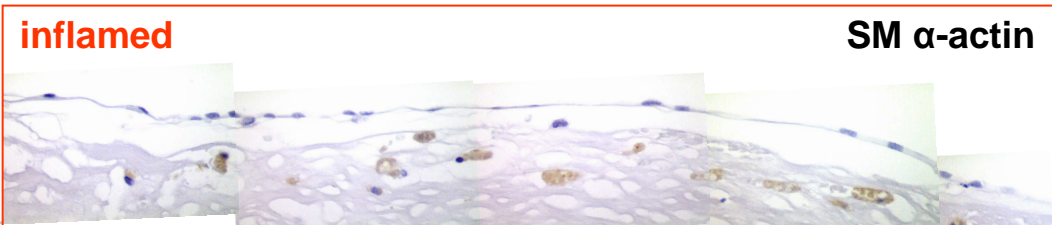

S4 Fig.

Supplement: S4 (10.1371/journal.pone.0145777.s004) [file journal.pone.0145777.s004.pdf]
